# Supplementary material for: Facile synthesis of ultrathin worm-like Au nanowires for highly active SERS substrates
Source: Royal Society of Chemistry journal article supplement (doi:10.1039/c3nj01518a), 2014-01-01
Supplement: c3nj01518a1.pdf [file c3nj01518a1.pdf]

## Supporting Information

### **Facile synthesis of ultrathin worm-like Au nanowires for highly active SERS substrates**

Ai-Jun Wang, Jing-Jing Lv, Dan-Ling Zhou, Xuexiang Weng, Su-Fang Qin, Jiu-Ju Feng\*

*College of Geography and Environmental Science, College of Chemistry and Life Science,*

*Zhejiang Normal University, Jinhua 321004, China*

*\*Corresponding author: [jjfeng@zjnu.cn](mailto:jjfeng@zjnu.cn) (JJF), Tel./Fax: +86 579 82282269.*

## **Experimental**

1. Measurements of the electrochemically active surface area (EASA) and the roughness factor (R).

The Au nanowires modified glassy carbon electrode (GCE, 3 mm in diameter) electrode was prepared according to the Au films process. After drying in air, 3  $\mu\text{L}$  or 5  $\mu\text{L}$  of Nafion (0.05 wt%) was covered on the electrode surfaces and allowed drying in air again. The electrochemical measurements were conducted on a CHI660b electrochemical workstation (CH Instruments, Chenhua Co., Shanghai, China) at room temperature.

A standard three-electrode system was employed for all the electrochemical measurements, which consisted of a Pt mesh as the counter electrode, an Ag/AgCl electrode as the reference electrode, and the modified glassy carbon electrode as the working electrode.

The typical cyclic voltammogram of the Au nanowires modified electrodes was recorded in 0.5 M  $\text{H}_2\text{SO}_4$  at a scan rate of 50  $\text{mV s}^{-1}$ . The electrochemically active surface area (EASA) was estimated from Coulombic integration of the enhanced cathodic peak current at 0.89 V. The roughness factor (R) of the surface, the ratio of real surface to the geometric surface, was calculated.

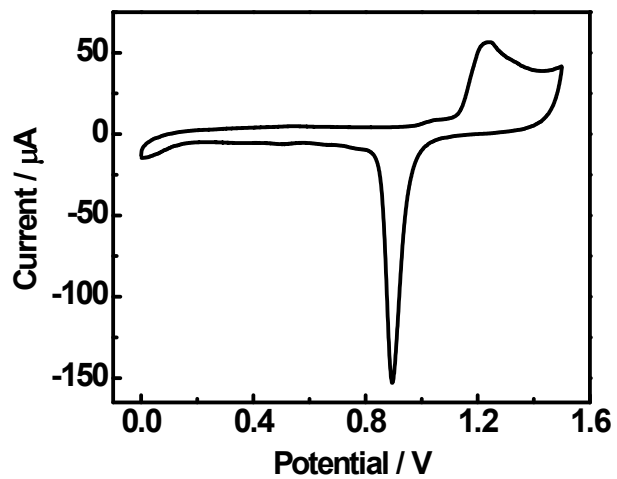

**Figure S1.** The cyclic voltammogram of the Au nanowires modified electrode in 0.5 M  $\text{H}_2\text{SO}_4$  at a scan rate of  $50 \text{ mV s}^{-1}$ .

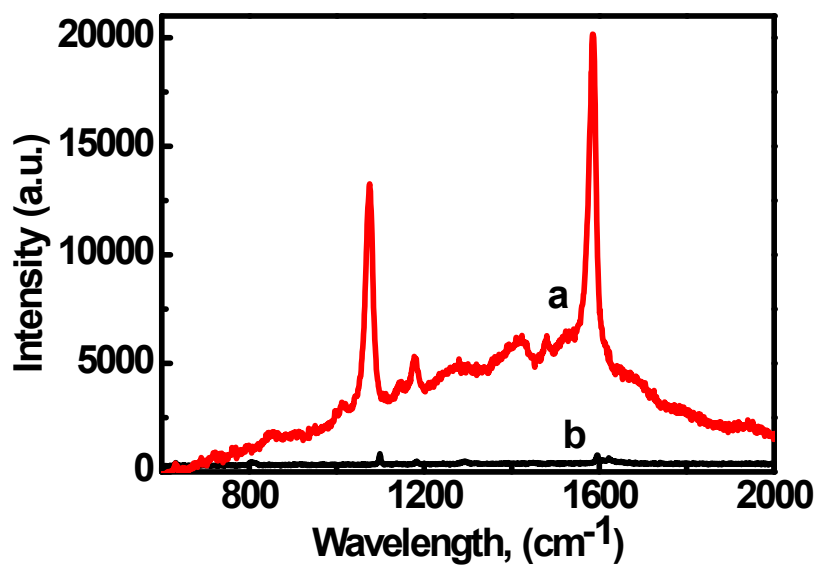

**Figure S2.** The SERS spectra of 4-MBA adsorbed on the Au porous film as Raman-active substrates (curve a), and Raman spectrum of 4-MBA dispersed on the quartz plate (curve b).
